# Supplementary material for: Alignment and impact angular dependence to O2 sticking and dissociation on Pt(111) and close-packed steps
Source: Royal Society of Chemistry journal article supplement (doi:10.1039/d2cp00934j), 2022-01-01
Supplement: d2cp00934j1.pdf [file d2cp00934j1.pdf]

Cite this: DOI: 00.0000/xxxxxxxxxx

# Alignment and impact angular dependence to O<sub>2</sub> sticking and dissociation on Pt(111) and close-packed steps<sup>†</sup>

Maatje J.E. de Willigen,<sup>a</sup> Mitsunori Kurahashi,<sup>b</sup> and Ludo B.F. Juurlink<sup>a</sup>

## 1 Electronic Supporting information

**Table 1** Integrals for the measurements on Pt(111)

| H      | C <sub>z</sub> | C <sub>y</sub> | Angle (°) |
|--------|----------------|----------------|-----------|
| 1891.1 | 1219.2         | -              | 0         |
| 1502.7 | 830.1          | -              | 0         |
| -      | 1559           | 1509.2         | 0         |
| -      | 1368.3         | 1322           | 0         |
| 1685.4 | 791            | -              | -30       |
| -      | 1262.2         | 1403.3         | -30       |
| 1621.9 | 1011.6         | -              | 30        |
| -      | 848            | 872.5          | 30        |
| -      | 1006.6         | 1018.8         | 30        |
| 1761.2 | 1353.8         | -              | -45       |
| -      | 1257.8         | 1491.9         | -45       |
| 1863.6 | 1478.8         | -              | 45        |
| 1167.4 | 712.8          | -              | 45        |
| -      | 660.9          | 848.3          | 45        |
| -      | 495.3          | 941.7          | 45        |

Table 1 shows the integrals of the fit functions of experiments that were performed on Pt(111) at  $E_i = 0.33$  eV with varying incident degrees of angular motion. The individually fitted exponents from the experiments were integrated from  $t_0$  of each experiment until the valve closes (around  $40 \times 10^3$  ms). We find that experiments with the same reaction conditions ( $E_i$ ,  $\theta_i$  and the same alteration in H vs C angular motion) do not result in the same integrated sticking probabilities, which would reflect the total adsorbed O<sub>2</sub> in the experiment. For instance, two separate experiments for Pt(111) at 0° incident angle (first two entries in table 1, yield integrals for H that vary by 26% and for C<sub>z</sub> by 47%. Hence, the ratio of the integrated signals for H and C<sub>z</sub> are also unequal (1.55 vs 1.81). In contrast, the values of  $S_0$  for both alignments match rather well, i.e. 0.178 and 0.173 for H and 0.110 and 0.114 for C<sub>z</sub>. The same occurs in entries 12 and 13. For comparison of C<sub>y</sub> and C<sub>z</sub>, we even find that the integrated values change in opposite direction between two identical experiments (entries 14 and 15). The lack of reproducibility in the (relative) integrals renders us unable to extract coverage dependent sticking proba-

bilities for Pt(111). We find the same lack of reproducibility in the data for the stepped Pt surfaces.

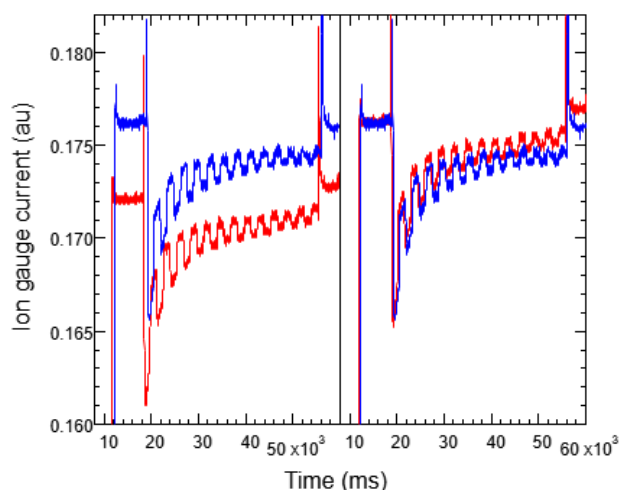

**Fig. 1** Initial sticking probability of O<sub>2</sub> as a function of time on a Pt(111) surface for 0.1 eV incident energy for two experiments. The direction of rotational motion of O<sub>2</sub> relative to the Pt surface is switched between H and C<sub>z</sub> with the crystal surface at an angle of 0°.

At least one origin of the variation in integrated signals has been identified. Figure 1 shows the traces for the first two experiments on Pt(111), where the direction of rotational motion is switched between H and C<sub>z</sub> (entries 1 and 2 in the table). The blue line represents experiment 1 and the red line in experiment 2. In both sections, the data are moved such that the timestamps are the same. In the right panel, the data from experiment 2 is also vertically shifted to match the base ion gauge current prior to the beam's impingement onto the surface. The two experiments are very similar, but the data in experiment 2 relapses to its original ion gauge current after the beam flag is closed, whilst experiment 1 shows a current that does not match the starting current. The fit functions for these experiments are different and result in higher integrals for experiment 1 compared to experiment 2. Possible origins for the non-identical currents prior to and after the experiment have been discussed in the text. One could imagine trying to correct for the apparent time-dependent off sets for each of the two alignments, e.g. by a linear off setting correc-

<sup>a</sup>Leiden Institute of Chemistry, Leiden University, Einsteinweg 55, 2333 CC, Leiden, the Netherlands. Tel: +31 71 527 4221; E-mail: ljuurlink@chem.leidenuniv.nl

<sup>b</sup>Surface Characterization Group, National Institute for Materials Science, 1-2-1 Sen- gen, Tsukuba, Ibaraki 305-0047, Japan

tion during the exposure of the crystal to the beam, but a physical basis for this is lacking. This would make the correction, thus, arbitrary.
